# Supplementary material for: CXCL8 Chemokines in Teleost Fish: Two Lineages with Distinct Expression Profiles during Early Phases of Inflammation
Source: PubMed Central journal article supplement (PMC2928728; doi:10.1371/journal.pone.0012384), 2010-08-26
Supplement: pone.0012384.s002.pdf [file pone.0012384.s002.pdf]

# A

CXCL8\_L1\_chr1

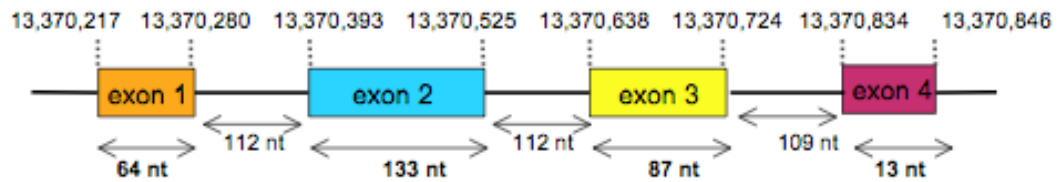

CXCL8\_L2\_chr7

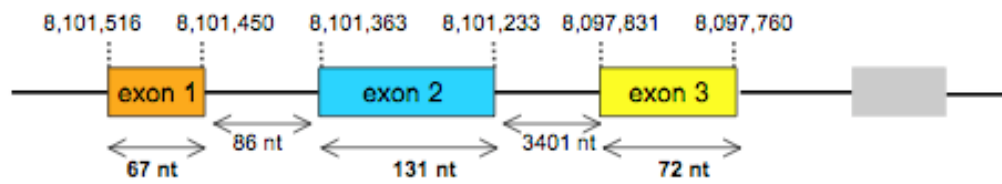

CXCL8\_L2\_chr17

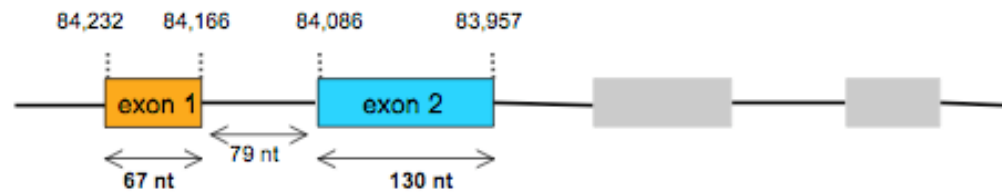

# B

| SeqA | Name          | Len (nt) | Name           | Len (nt) | Score |
|------|---------------|----------|----------------|----------|-------|
| 1    | CXCL8_L1_Chr1 | 298      | CXCL8_L2_Chr7  | 270      | 15    |
| 1    | CXCL8_L1_Chr1 | 298      | CXCL8_L2_Chr17 | 197      | 41    |
| 2    | CXCL8_L2_Chr7 | 270      | CXCL8_L2_Chr17 | 197      | 89    |

**C**

| SeqA | Name                            | Len(aa) | Name                            | Len(aa) | Score |
|------|---------------------------------|---------|---------------------------------|---------|-------|
| 1    | Dare_CXCL8_chr1_L1              | 98      | Dare_CXCL8_chr7_L2              | 118     | 23    |
| 1    | Dare_CXCL8_chr1_L1              | 98      | Dare_ESTEH557944/CXCL8_Chr17_L2 | 118     | 23    |
| 1    | Dare_CXCL8_chr1_L1              | 98      | Cyca_CXCa_L1                    | 98      | 71    |
| 1    | Dare_CXCL8_chr1_L1              | 98      | Cyca_CXCL8_L2                   | 99      | 22    |
| 2    | Dare_CXCL8_chr7_L2              | 118     | Dare_ESTEH557944/CXCL8_Chr17_L2 | 118     | 100   |
| 2    | Dare_CXCL8_chr7_L2              | 118     | Cyca_CXCa_L1                    | 98      | 30    |
| 2    | Dare_CXCL8_chr7_L2              | 118     | Cyca_CXCL8_L2                   | 99      | 54    |
| 3    | Dare_ESTEH557944/CXCL8_Chr17_L2 | 118     | Cyca_CXCa_L1                    | 98      | 30    |
| 3    | Dare_ESTEH557944/CXCL8_Chr17_L2 | 118     | Cyca_CXCL8_L2                   | 99      | 54    |
| 4    | Cyca_CXCa_L1                    | 98      | Cyca_CXCL8_L2                   | 99      | 24    |

**D**

```

EST_EH557944      MKLSVSAFMLLICTTALLCANEGEALPPPQRCQCIKTHSKPPIPKRQVLGLKVTGAGSHC 60
CXCL8_chr17      MKLSVSAFMLLICTTALLCANEGEALPPPQRCQCIKTHSKPPIPKRQVLGLKVTGAGSHC 60
CXCL8_chr7       MKLSI SAFMLLICTTALQCTNEGQPPPPPLRCQCVKIYSQPPPIPRRQVLALKVN-SGPHC 59
Carp_CXCL8       MKLTVSAFMLLICTAALLSTTEGRPKSQQLSCRCPRMHSEPAIPANKVLSLRVIPAGPIC 60
                  ***::*****:** ..**.. .   *:* : :*:** .:***:** :*. *

EST_EH557944      RNEEIIATLKKGQICLNPTETWVVISLKEKFAASATKLAATAAPAQTTFSTIMTTN 117
CXCL8_chr17      RNEEI----- 65
CXCL8_chr7       RNEEIMATLKNQGTCLNPTENWVMSLKTQV----- 89
Carp_CXCL8       KNENIIATMKGQVCLDPTKDWVISLNEEIKKRNLSQP----- 99
                  :***:

```

**Figure S1 Zebrafish CXCL8 gene structure and similarity with carp CXCL8.**

**A** Schematic representation of intron/exon organization of zebrafish CXCL8 genes on chromosome 1, 7 and 17. Location on the genome of first and last nucleotides for each exon are indicated on top of each gene, intron and exon sizes are indicated under each gene structure. **B** Similarity in nucleotides between zebrafish CXCL8 genes located on chromosome 1, 7 and 17, determined by ClustalW. **C** Similarity in amino acids between carp (*Cyca*, *Cyprinus carpio*) and zebrafish (*Dare*, *Danio rerio*) CXCL8 sequences, determined by ClustalW. **D** Multiple protein sequence alignment with zebrafish EST\_EH557944 (L2), zebrafish CXCL8\_L2\_chr17, zebrafish CXCL8\_L2\_chr7 and carp CXCL8\_L2. Differences in amino acids in comparison to zebrafish EST\_EH557944 are indicated in red
