# Supplementary material for: CXCL8 Chemokines in Teleost Fish: Two Lineages with Distinct Expression Profiles during Early Phases of Inflammation
Source: PubMed Central journal article supplement (PMC2928728; doi:10.1371/journal.pone.0012384), 2010-08-26
Supplement: pone.0012384.s003.pdf [file pone.0012384.s003.pdf]

**A**

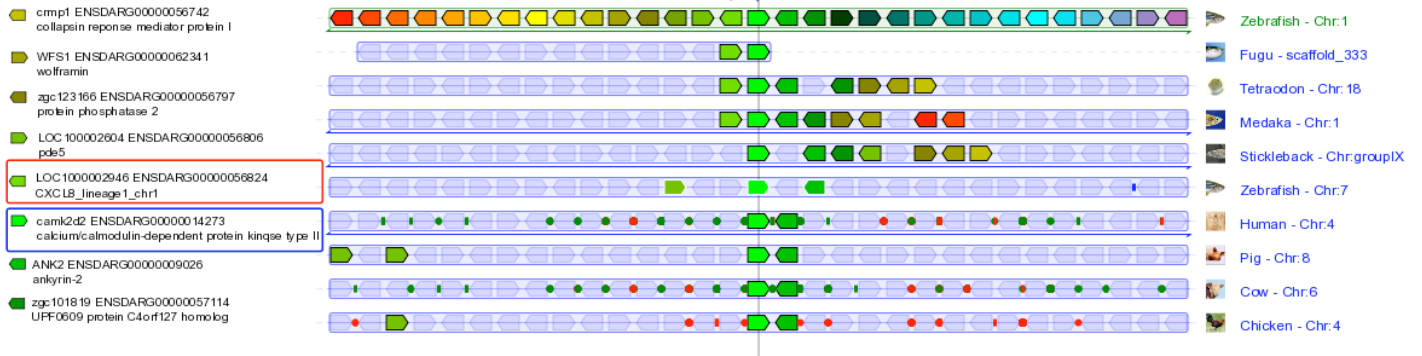

**B**

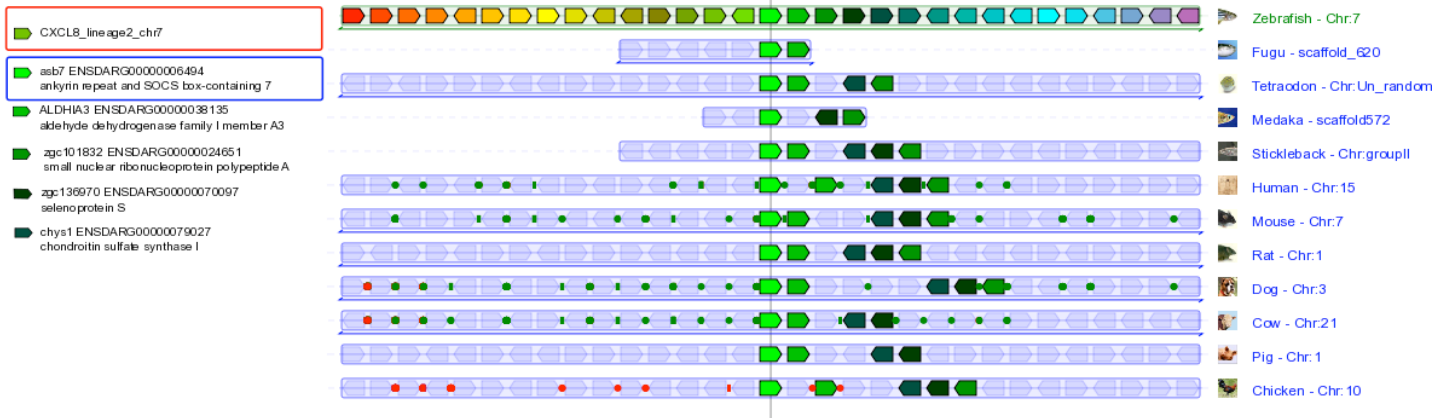

**C**

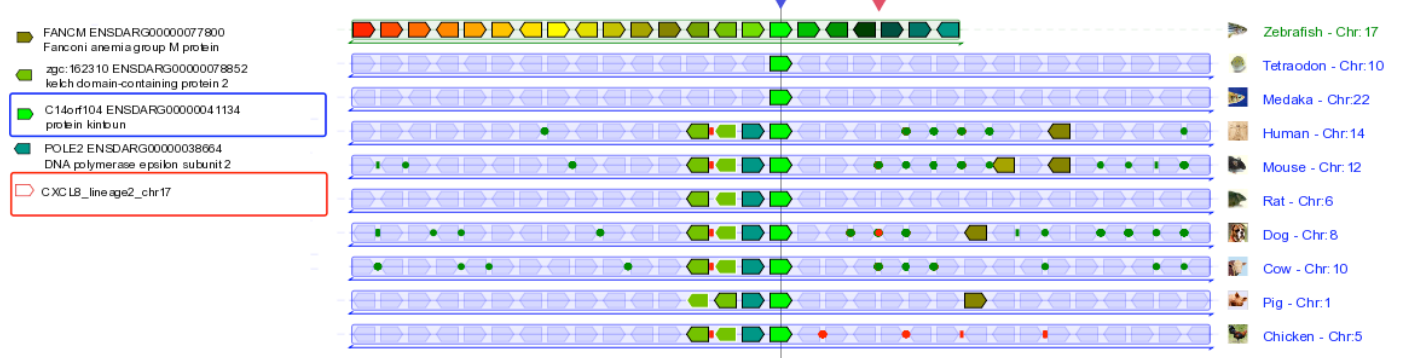

**Figure S2 Syntenic organization of zebrafish CXCL8 genes.**

Zebrafish *CXCL8\_L1\_chr1* (A), *CXCL8\_L2\_chr7* (B) and *CXCL8\_L2\_chr17* (C). Each reference gene is indicated by a blue arrow and boxed in blue, CXCL8 genes are indicated by a red arrow and boxed in red. Genes that are in synteny are indicated at the left side of the alignment with zebrafish as reference species.
