# Supplementary material for: CXCL8 Chemokines in Teleost Fish: Two Lineages with Distinct Expression Profiles during Early Phases of Inflammation
Source: PubMed Central journal article supplement (PMC2928728; doi:10.1371/journal.pone.0012384), 2010-08-26
Supplement: pone.0012384.s004.pdf [file pone.0012384.s004.pdf]

### Recombinant carp CXCL8\_L2

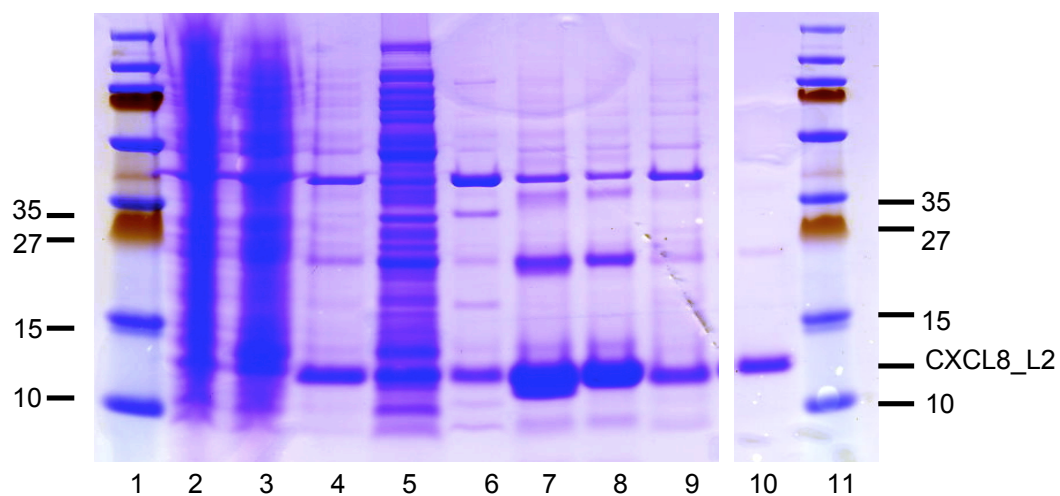

### Recombinant carp CXCa\_L1

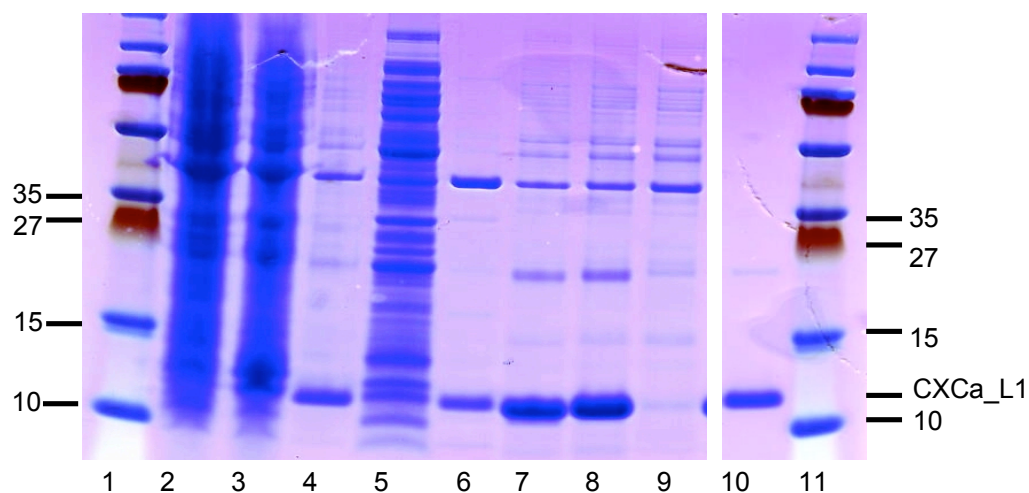

1 = Dual color protein marker  
2 = total bacterial lysate non-induced  
3 = total bacterial lysate IPTG-induced  
4 = non-soluble fraction  
5 = soluble fraction  
6 = non-resuspended inclusion bodies

7 = inclusion bodies resuspended in urea (total)  
8 = inclusion bodies resuspended in urea  
(supernatant, used on column)  
9 = flow-through  
10 = eluted protein after dialysis and filtration  
11 = dual protein marker

**Figure S3 Production of recombinant carp CXCa\_L1 and carp CXCL8\_L2 in *E. coli*.** Samples were collected at several steps during the preparation and analyzed on polyacrylamide gel.
